# Supplementary material
Source: PubMed Central journal article supplement (PMC2139994)
Supplement: 97320630002031S1.pdf [file 97320630002031S1.pdf]

### Supplementary material

| Method                            | Pros                                                                                                                                     | Cons                                                                                                                                    |
|-----------------------------------|------------------------------------------------------------------------------------------------------------------------------------------|-----------------------------------------------------------------------------------------------------------------------------------------|
| Sequence based                    | Most known or reliable method ; Based on sequence homology                                                                               | Many BLAST hits are either electronically annotated or hypothetical. Some phosphorylation sites or short motifs produce false positives |
| Structure-based                   | Global fold methods or active site characterization ; Structural homology                                                                | Global fold similarity does NOT correlate with functional similarity                                                                    |
| Association based                 | Involves domains or phylogenetic profile                                                                                                 | Lack of conserved proximity does not indicate lack of functional association                                                            |
| Proteomics and metabolomics based | PPI ; Gaps or holes in known pathways can be intuitively assigned :<br>Function awaits a protein to be characterized to match that "gap" | False positives                                                                                                                         |

**Table 1:** The pros and cons in the form of strengths and limitations of various methods used for functional annotation
